# Supplementary material for: Excess Mortality From Suicide During the Early COVID-19 Pandemic Period in Japan: A Time-Series Modeling Before the Pandemic
Source: PubMed Central journal article supplement (PMC7813773; doi:10.2188/jea.je20200443), 2021-02-05
Supplement: je-31-152-s001.pdf [file je-31-152-s001.pdf]

Under 20 years old

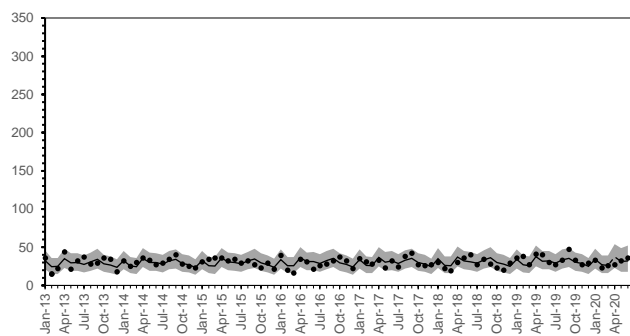

20 to 29 years old

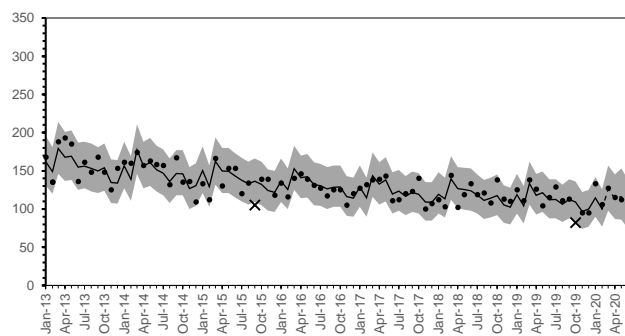

30 to 39 years old

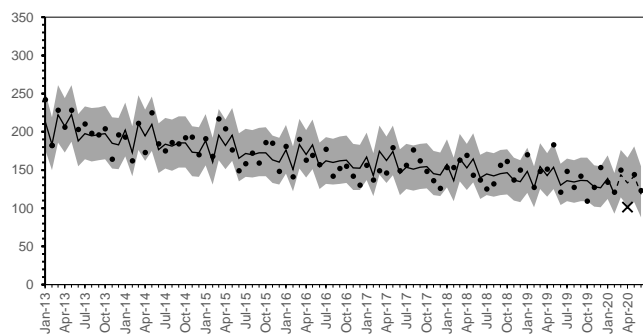

40 to 49 years old

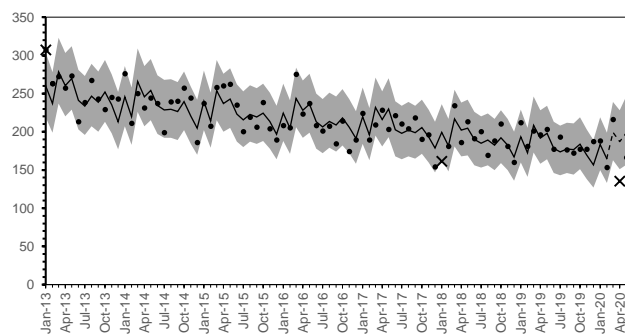

50 to 59 years old

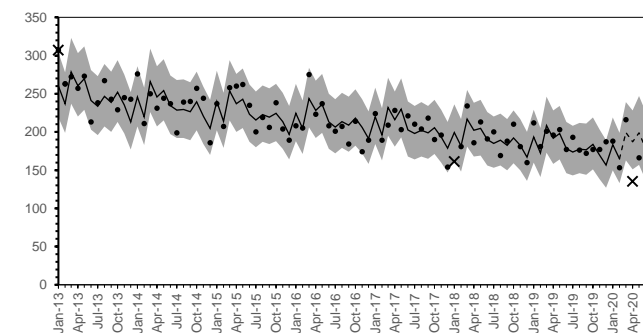

60 to 69 years old

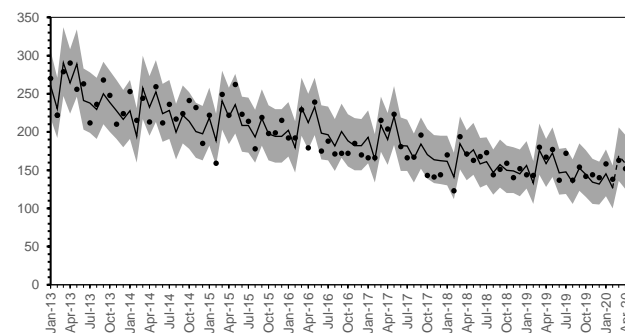

70 to 79 years old

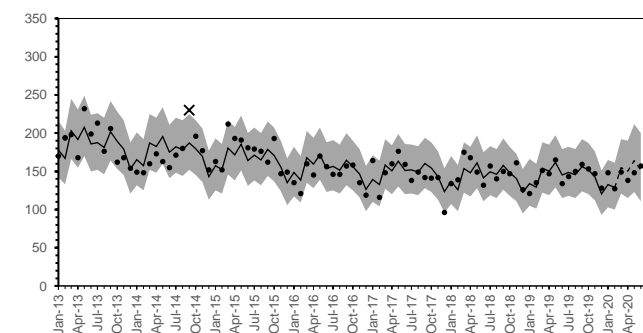

Over 80 years old

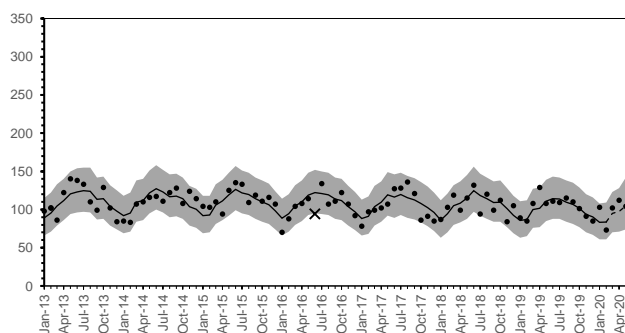

**eFigure 1.** Monthly number of suicide and 95% prediction interval by age categories for male. Dots: observed number of suicides within the 95% prediction interval; ×: observed number of suicides outside the 95% prediction interval; Solid line: predicted number of suicides in non-pandemic periods; Dashed line: predicted number of suicides in pandemic periods; Gray strip: 95% prediction interval for number of suicides based on the simulated distribution.

Under 20 years old

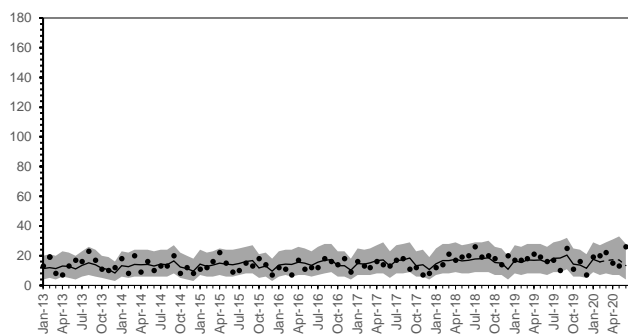

20 to 29 years old

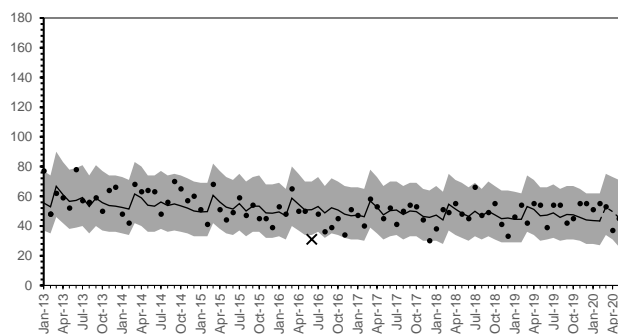

30 to 39 years old

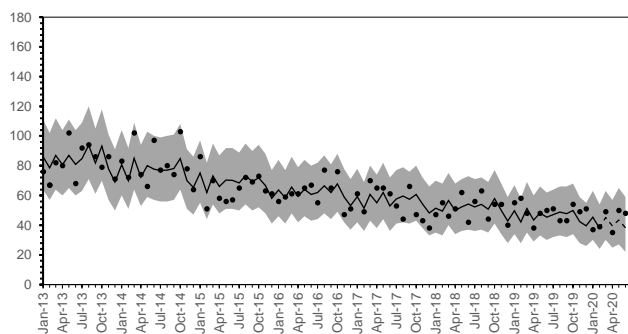

40 to 49 years old

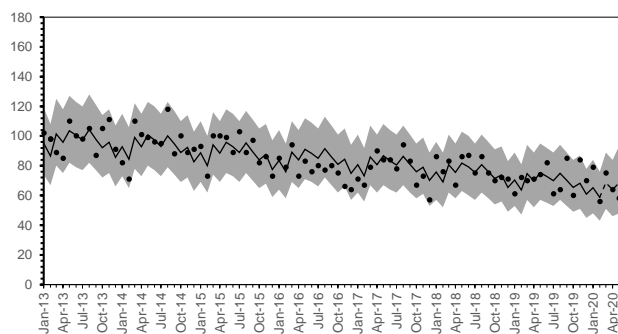

50 to 59 years old

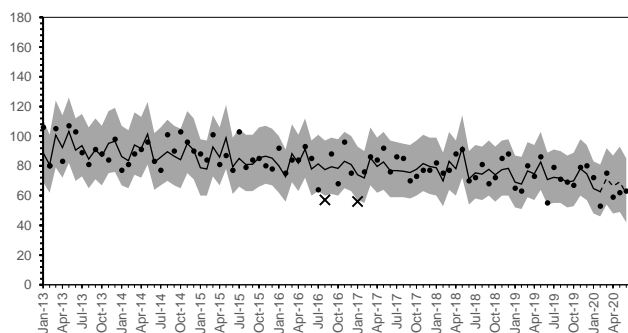

60 to 69 years old

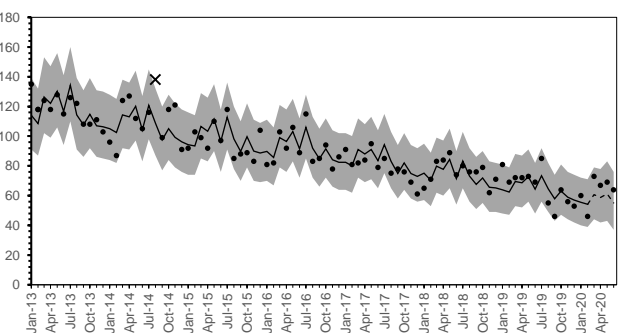

70 to 79 years old

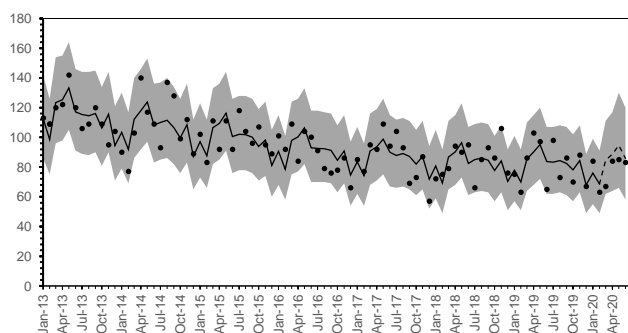

Over 80 years old

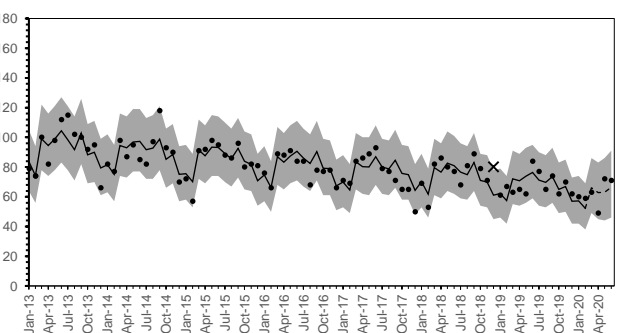

**eFigure 2.** Monthly number of suicide and 95% prediction interval by age categories for female. Dots: observed number of suicides within the 95% prediction interval; ×: observed number of suicides outside the 95% prediction interval; Solid line: predicted number of suicides in non-pandemic periods; Dashed line: predicted number of suicides in pandemic periods; Gray strip: 95% prediction interval for number of suicides based on the simulated distribution.

**eTable 1.** Number of suicides and excess mortality by prefecture

| Prefecture    | March           |                                         |                  |                         | April           |                                         |                  |                         | May             |                                         |                  |                         | June            |                                         |                  |                         |
|---------------|-----------------|-----------------------------------------|------------------|-------------------------|-----------------|-----------------------------------------|------------------|-------------------------|-----------------|-----------------------------------------|------------------|-------------------------|-----------------|-----------------------------------------|------------------|-------------------------|
|               | Observed number | Prediction number (95% PI) <sup>a</sup> | Excess mortality | Relative difference (%) | Observed number | Prediction number (95% PI) <sup>a</sup> | Excess mortality | Relative difference (%) | Observed number | Prediction number (95% PI) <sup>a</sup> | Excess mortality | Relative difference (%) | Observed number | Prediction number (95% PI) <sup>a</sup> | Excess mortality | Relative difference (%) |
| Hokkaido      | 69              | 70.7 (53, 91)                           | -1.7             | -2.4                    | 69              | 67.2 (50, 86)                           | 1.8              | 2.7                     | 63              | 74.3 (53, 99)                           | -11.3            | -15.2                   | 69              | 66.7 (49, 86)                           | 2.3              | 3.4                     |
| Aomori-ken    | 22              | 18.9 (10, 30)                           | 3.1              | 16.4                    | 20              | 18.8 (10, 29)                           | 1.2              | 6.4                     | 18              | 15.4 (7, 27)                            | 2.6              | 16.9                    | 13              | 17.8 (9, 28)                            | -4.8             | -26.9                   |
| Iwate-ken     | 27              | 21.3 (12, 33)                           | 5.7              | 26.8                    | 21              | 19.0 (10, 29)                           | 2.0              | 10.5                    | 13              | 22.9 (12, 37)                           | -9.9             | -43.3                   | 19              | 18.8 (10, 29)                           | 0.2              | 1.1                     |
| Miyagi-ken    | 44              | 31.6 (19, 47)                           | 12.4             | 39.2                    | 29              | 29.3 (17, 44)                           | -0.3             | -1.0                    | 30              | 36.8 (21, 57)                           | -6.8             | -18.5                   | 30              | 28.1 (16, 42)                           | 1.9              | 6.8                     |
| Akita-ken     | 16              | 14.8 (7, 25)                            | 1.2              | 8.1                     | 13              | 14.6 (7, 24)                            | -1.6             | -10.9                   | 15              | 13.5 (6, 24)                            | 1.5              | 11.1                    | 11              | 13.9 (7, 23)                            | -2.9             | -20.8                   |
| Yamagata-ken  | 11              | 16.3 (7, 28)                            | -5.3             | -32.6                   | 14              | 15.9 (7, 27)                            | -1.9             | -11.9                   | 13              | 17.5 (7, 33)                            | -4.5             | -25.7                   | 19              | 13.3 (5, 23)                            | 5.7              | 42.7                    |
| Fukushima-ken | 33              | 27.7 (15, 43)                           | 5.3              | 19.1                    | 17              | 25.3 (14, 40)                           | -8.3             | -32.8                   | 38              | 28.3 (15, 47)                           | 9.7              | 34.3                    | 18              | 27.0 (15, 42)                           | -9.0             | -33.3                   |
| Ibaraki-ken   | 40              | 36.5 (23, 53)                           | 3.5              | 9.6                     | 19 <sup>b</sup> | 39.0 (25, 55)                           | -20.0            | -51.2                   | 28              | 32.8 (19, 51)                           | -4.8             | -14.6                   | 29              | 38.3 (24, 54)                           | -9.3             | -24.3                   |
| Tochigi-ken   | 28              | 28.0 (16, 42)                           | 0.0              | 0.0                     | 22              | 29.9 (18, 44)                           | -7.9             | -26.4                   | 16 <sup>b</sup> | 31.3 (18, 49)                           | -15.3            | -48.9                   | 22              | 24.4 (14, 37)                           | -2.4             | -9.9                    |
| Gumma-ken     | 22              | 31.7 (20, 46)                           | -9.7             | -30.6                   | 38              | 30.1 (19, 43)                           | 7.9              | 26.3                    | 27              | 31.8 (19, 49)                           | -4.8             | -15.1                   | 26              | 24.6 (14, 37)                           | 1.4              | 5.7                     |
| Saitama-ken   | 89              | 89.7 (67, 115)                          | -0.7             | -0.8                    | 80              | 83.9 (62, 108)                          | -3.9             | -4.6                    | 61 <sup>b</sup> | 91.3 (66, 121)                          | -30.3            | -33.2                   | 83              | 76.2 (56, 99)                           | 6.8              | 8.9                     |
| Chiba-ken     | 92              | 73.0 (53, 96)                           | 19.0             | 26.0                    | 73              | 70.9 (51, 93)                           | 2.1              | 3.0                     | 74              | 67.6 (46, 93)                           | 6.4              | 9.5                     | 73              | 63.9 (46, 85)                           | 9.1              | 14.2                    |
| Tokyo-to      | 85 <sup>b</sup> | 153.3 (107, 208)                        | -68.3            | -44.6                   | 24 <sup>b</sup> | 146.8 (102, 198)                        | -122.8           | -83.7                   | 71 <sup>b</sup> | 141.5 (93, 202)                         | -70.5            | -49.8                   | 43 <sup>b</sup> | 153.9 (108, 207)                        | -110.9           | -72.1                   |
| Kanagawa-ken  | 90              | 81.9 (60, 106)                          | 8.1              | 9.9                     | 78              | 84.0 (62, 107)                          | -6.0             | -7.1                    | 82              | 77.1 (54, 104)                          | 4.9              | 6.4                     | 83              | 87.6 (66, 112)                          | -4.6             | -5.2                    |
| Niigata-ken   | 29              | 37.8 (24, 54)                           | -8.8             | -23.3                   | 29              | 34.3 (22, 49)                           | -5.3             | -15.5                   | 33              | 34.9 (21, 53)                           | -1.9             | -5.4                    | 33              | 36.1 (23, 51)                           | -3.1             | -8.6                    |
| Toyama-ken    | 19              | 14.1 (6, 25)                            | 4.9              | 34.7                    | 18              | 13.7 (6, 24)                            | 4.3              | 31.4                    | 21              | 12.4 (4, 24)                            | 8.6              | 69.6                    | 19              | 14.6 (6, 25)                            | 4.4              | 30.2                    |
| Ishikawa-ken  | 15              | 17.4 (8, 29)                            | -2.4             | -13.8                   | 11              | 14.0 (6, 24)                            | -3.0             | -21.4                   | 8               | 17.8 (8, 33)                            | -9.8             | -55.1                   | 15              | 14.1 (6, 24)                            | 0.9              | 6.4                     |
| Fukui-ken     | 16              | 8.8 (3, 17)                             | 7.2              | 81.9                    | 10              | 9.4 (3, 17)                             | 0.6              | 6.4                     | 4               | 7.4 (2, 16)                             | -3.4             | -46.2                   | 12              | 10.2 (4, 19)                            | 1.8              | 17.6                    |
| Yamanashi-ken | 10              | 13.2 (5, 24)                            | -3.2             | -24.3                   | 5               | 10.9 (4, 20)                            | -5.9             | -54.0                   | 3 <sup>b</sup>  | 11.2 (4, 23)                            | -8.2             | -73.2                   | 6               | 10.6 (4, 20)                            | -4.6             | -43.3                   |
| Nagano-ken    | 23              | 32.0 (20, 46)                           | -9.0             | -28.1                   | 16              | 26.9 (16, 40)                           | -10.9            | -40.6                   | 38              | 31.2 (18, 48)                           | 6.8              | 21.8                    | 18              | 22.9 (13, 34)                           | -4.9             | -21.4                   |
| Gifu-ken      | 27              | 25.2 (15, 38)                           | 1.8              | 7.1                     | 15              | 24.2 (14, 36)                           | -9.2             | -38.0                   | 22              | 26.1 (15, 41)                           | -4.1             | -15.7                   | 17              | 21.0 (12, 32)                           | -4.0             | -19.1                   |
| Shizuoka-ken  | 49              | 52.5 (37, 70)                           | -3.5             | -6.7                    | 46              | 45.0 (31, 61)                           | 1.0              | 2.2                     | 55              | 57.8 (39, 81)                           | -2.8             | -4.8                    | 34              | 47.9 (33, 65)                           | -13.9            | -29.0                   |
| Aichi-ken     | 91              | 95.6 (73, 121)                          | -4.6             | -4.8                    | 79              | 92.6 (71, 117)                          | -13.6            | -14.7                   | 77 <sup>b</sup> | 110.6 (82, 143)                         | -33.6            | -30.4                   | 72              | 89.8 (69, 114)                          | -17.8            | -19.8                   |
| Mie-ken       | 27              | 23.7 (12, 37)                           | 3.3              | 13.9                    | 20              | 23.0 (12, 36)                           | -3.0             | -13.0                   | 20              | 25.0 (12, 43)                           | -5.0             | -20.0                   | 25              | 25.1 (14, 40)                           | -0.1             | -0.4                    |
| Shiga-ken     | 14              | 20.8 (11, 33)                           | -6.8             | -32.7                   | 20              | 16.1 (8, 25)                            | 3.9              | 24.2                    | 10              | 21.1 (10, 36)                           | -11.1            | -52.7                   | 17              | 17.5 (9, 28)                            | -0.5             | -2.9                    |
| Kyoto-fu      | 27              | 22.3 (13, 34)                           | 4.7              | 21.1                    | 26              | 21.5 (12, 32)                           | 4.5              | 20.9                    | 20              | 21.6 (12, 34)                           | -1.6             | -7.4                    | 20              | 24.7 (15, 36)                           | -4.7             | -19.0                   |
| Osaka-fu      | 85              | 77.9 (54, 106)                          | 7.1              | 9.1                     | 71              | 70.5 (49, 96)                           | 0.5              | 0.7                     | 100             | 78.8 (53, 112)                          | 21.2             | 26.9                    | 86              | 77.6 (54, 106)                          | 8.4              | 10.8                    |
| Hyogo-ken     | 59              | 77.7 (58, 100)                          | -18.7            | -24.1                   | 61              | 68.8 (50, 89)                           | -7.8             | -11.3                   | 67              | 79.5 (57, 106)                          | -12.5            | -15.7                   | 84 <sup>b</sup> | 63.1 (46, 82)                           | 20.9             | 33.1                    |
| Nara-ken      | 11              | 15.0 (7, 25)                            | -4.0             | -26.7                   | 10              | 14.0 (6, 24)                            | -4.0             | -28.6                   | 13              | 13.0 (5, 25)                            | 0.0              | 0.0                     | 10              | 13.7 (6, 24)                            | -3.7             | -27.0                   |
| Wakayama-ken  | 13              | 11.1 (5, 19)                            | 1.9              | 17.1                    | 12              | 14.6 (7, 24)                            | -2.6             | -17.8                   | 11              | 11.5 (4, 22)                            | -0.5             | -4.4                    | 14              | 14.1 (7, 24)                            | -0.1             | -0.7                    |
| Tottori-ken   | 3               | 5.7 (1, 13)                             | -2.7             | -47.5                   | 4               | 6.6 (2, 14)                             | -2.6             | -39.1                   | 2               | 6.0 (1, 15)                             | -4.0             | -66.4                   | 3               | 4.0 (0, 10)                             | -1.0             | -25.1                   |
| Shimane-ken   | 6               | 8.0 (3, 15)                             | -2.0             | -24.8                   | 6               | 7.2 (2, 14)                             | -1.2             | -16.7                   | 9               | 7.3 (2, 16)                             | 1.7              | 23.2                    | 11              | 9.2 (3, 17)                             | 1.8              | 19.5                    |
| Okayama-ken   | 24              | 21.8 (12, 34)                           | 2.2              | 10.1                    | 18              | 20.2 (11, 31)                           | -2.2             | -10.9                   | 14              | 19.9 (10, 33)                           | -5.9             | -29.6                   | 17              | 22.6 (13, 34)                           | -5.6             | -24.8                   |
| Hiroshima-ken | 37              | 32.4 (20, 47)                           | 4.6              | 14.2                    | 25              | 33.3 (21, 47)                           | -8.3             | -24.9                   | 23              | 33.9 (20, 51)                           | -10.9            | -32.2                   | 28              | 36.5 (23, 52)                           | -8.5             | -23.3                   |
| Yamaguchi-ken | 28 <sup>b</sup> | 15.1 (7, 25)                            | 12.9             | 85.4                    | 18              | 13.0 (6, 22)                            | 5.0              | 38.3                    | 18              | 13.6 (6, 25)                            | 4.4              | 32.5                    | 15              | 18.1 (9, 29)                            | -3.1             | -17.2                   |
| Tokushima-ken | 9               | 8.2 (3, 16)                             | 0.8              | 9.8                     | 6               | 7.3 (2, 14)                             | -1.3             | -17.7                   | 4               | 7.9 (2, 17)                             | -3.9             | -49.1                   | 8               | 6.6 (2, 13)                             | 1.4              | 21.4                    |
| Kagawa-ken    | 9               | 12.0 (5, 21)                            | -3.0             | -25.0                   | 13              | 14.3 (7, 24)                            | -1.3             | -9.1                    | 8               | 11.7 (4, 22)                            | -3.7             | -31.6                   | 8               | 14.3 (7, 24)                            | -6.3             | -44.0                   |
| Ehime-ken     | 16              | 16.6 (8, 27)                            | -0.6             | -3.6                    | 18              | 16.0 (8, 26)                            | 2.0              | 12.5                    | 18              | 13.6 (6, 24)                            | 4.4              | 32.4                    | 12              | 17.8 (9, 28)                            | -5.8             | -32.7                   |
| Kochi-ken     | 8               | 8.0 (2, 17)                             | 0.0              | 0.0                     | 8               | 8.6 (2, 18)                             | -0.6             | -6.9                    | 6               | 9.6 (2, 22)                             | -3.6             | -37.5                   | 10              | 12.7 (5, 24)                            | -2.7             | -21.3                   |

|               |    |               |      |       |    |               |      |       |                |               |       |       |    |               |      |       |
|---------------|----|---------------|------|-------|----|---------------|------|-------|----------------|---------------|-------|-------|----|---------------|------|-------|
| Fukuoka-ken   | 59 | 66.6 (48, 88) | -7.6 | -11.4 | 57 | 57.2 (40, 77) | -0.2 | -0.3  | 63             | 61.0 (41, 84) | 2.0   | 3.3   | 62 | 53.3 (37, 72) | 8.7  | 16.3  |
| Saga-ken      | 11 | 13.1 (6, 23)  | -2.1 | -16.0 | 6  | 12.2 (5, 22)  | -6.2 | -50.7 | 6              | 14.0 (5, 27)  | -8.0  | -57.0 | 6  | 11.5 (5, 20)  | -5.5 | -48.0 |
| Nagasaki-ken  | 11 | 9.8 (4, 18)   | 1.2  | 12.3  | 15 | 10.4 (4, 18)  | 4.6  | 44.4  | 9              | 8.1 (2, 16)   | 0.9   | 11.2  | 9  | 11.0 (4, 19)  | -2.0 | -18.2 |
| Kumamoto-ken  | 32 | 27.4 (16, 42) | 4.6  | 16.8  | 22 | 25.9 (15, 39) | -3.9 | -15.1 | 18             | 27.3 (14, 45) | -9.3  | -34.1 | 14 | 18.3 (9, 29)  | -4.3 | -23.6 |
| Oita-ken      | 13 | 20.3 (11, 32) | -7.3 | -36.0 | 18 | 15.4 (8, 25)  | 2.6  | 16.9  | 7 <sup>b</sup> | 21.7 (11, 37) | -14.7 | -67.8 | 19 | 14.5 (7, 24)  | 4.5  | 30.9  |
| Miyazaki-ken  | 16 | 19.0 (10, 30) | -3.0 | -15.8 | 11 | 15.1 (7, 25)  | -4.1 | -27.1 | 22             | 17.7 (8, 31)  | 4.3   | 24.3  | 12 | 11.6 (5, 20)  | 0.4  | 3.4   |
| Kagoshima-ken | 23 | 22.4 (12, 35) | 0.6  | 2.7   | 23 | 22.7 (13, 36) | 0.3  | 1.3   | 28             | 25.7 (13, 43) | 2.3   | 8.9   | 26 | 24.3 (14, 38) | 1.7  | 7.0   |
| Okinawa-ken   | 14 | 14.8 (6, 26)  | -0.8 | -5.4  | 13 | 18.7 (9, 31)  | -5.7 | -30.5 | 13             | 16.1 (7, 30)  | -3.1  | -19.3 | 16 | 12.9 (5, 23)  | 3.1  | 24.1  |

PI, prediction interval.

<sup>a</sup>95% prediction interval based on the 2.5th and 97.5th percentile of simulated distribution.

<sup>b</sup>Observed number deviated by 95% prediction interval.
